# Supplementary material for: Multiplexed Digital mRNA Profiling of the Inflammatory Response in the West Nile Swiss Webster Mouse Model
Source: PubMed Central journal article supplement (PMC4207670; doi:10.1371/journal.pntd.0003216), 2014-10-23
Supplement: pntd.0003216.s011.pdf [file pntd.0003216.s011.pdf]

**Table S1: List of genes analyzed in this study with accession numbers**

| <b>Gene</b> | <b>Accession #</b> | <b>Gene</b> | <b>Accession #</b> | <b>Gene</b> | <b>Accession #</b> |
|-------------|--------------------|-------------|--------------------|-------------|--------------------|
| Atf2        | NM_001025093.1     | Ccr2        | NM_009915.2        | Fasl        | NM_010177.3        |
| Bcl6        | NM_009744.3        | Ccr3        | NM_009914.4        | Fos         | NM_010234.2        |
| C1qa        | NM_007572.2        | Ccr4        | NM_009916.2        | Fxyd2       | NM_052823.2        |
| C1qb        | NM_009777.2        | Ccr7        | NM_007719.2        | Gnaq        | NM_008139.5        |
| C1r         | NM_023143.3        | Cd4         | NM_013488.2        | Gnas        | NM_010309.3        |
| C1s         | NM_144938.2        | Cd40        | NM_011611.2        | Gnb1        | NM_008142.3        |
| C2          | NM_013484.2        | Cd40lg      | NM_011616.2        | Gngt1       | NM_010314.2        |
| C3          | NM_009778.2        | Cd55        | NM_010016.2        | Grb2        | NM_008163.3        |
| C3ar1       | NM_009779.2        | Cdc42       | NM_009861.1        | H2-Ea       | NM_010381.2        |
| C4a         | NM_011413.2        | Cebpb       | NM_009883.3        | H2-Eb1      | NM_010382.2        |
| C6          | NM_016704.2        | Cfb         | NM_008198.2        | Hc          | NM_010406.1        |
| C7          | XM_356827.6        | Cfd         | NM_013459.1        | Hdac4       | NM_207225.1        |
| C8a         | NM_146148.1        | Cfl1        | NM_007687.2        | Hmgn1       | NM_008251.3        |
| C8b         | NM_133882.2        | Creb1       | NM_133828.2        | Hras1       | NM_008284.2        |
| C9          | NM_013485.1        | Crp         | NM_007768.4        | Hspb1       | NM_013560.2        |
| Ccl11       | NM_011330.3        | Csf1        | NM_001113530.1     | Hspb2       | NM_024441.2        |
| Ccl17       | NM_011332.2        | Csf2        | NM_009969.4        | Ifna1       | NM_010502.2        |
| Ccl19       | NM_011888.2        | Csf3        | NM_009971.1        | Ifnb1       | NM_010510.1        |
| Ccl2        | NM_011333.3        | Cxcl1       | NM_008176.1        | Ifng        | NM_008337.1        |
| Ccl21b      | NM_011124.4        | Cxcl10      | NM_021274.1        | Il10        | NM_010548.1        |
| Ccl22       | NM_009137.2        | Cxcl2       | NM_009140.2        | Il10rb      | NM_008349.5        |
| Ccl24       | NM_019577.4        | Cxcl3       | NM_203320.2        | Il11        | NM_008350.2        |
| Ccl3        | NM_011337.1        | Cxcl5       | NM_009141.2        | Il12a       | NM_008351.1        |
| Ccl4        | NM_013652.1        | Cxcl9       | NM_008599.2        | Il12b       | NM_008352.1        |
| Ccl5        | NM_013653.1        | Cxcr4       | NM_009911.3        | Il13        | NM_008355.2        |
| Ccl7        | NM_013654.2        | Daxx        | NM_007829.3        | Il15        | NM_008357.1        |
| Ccl8        | NM_021443.2        | Ddit3       | NM_007837.3        | Il18        | NM_008360.1        |
| Ccr1        | NM_009912.4        | Elk1        | NM_007922.4        | Il18rap     | NM_010553.2        |

|         |                |          |                |          |                |
|---------|----------------|----------|----------------|----------|----------------|
| Il1a    | NM_010554.4    | Map2k1   | NM_008927.3    | Nr3c1    | NM_008173.3    |
| Il1b    | NM_008361.3    | Map2k4   | NM_009157.4    | Pdgfa    | NM_008808.3    |
| Il1r1   | NM_001123382.1 | Map2k6   | NM_011943.2    | Pik3c2g  | NM_011084.2    |
| Il1rap  | NM_008364.2    | Map3k1   | NM_011945.2    | Pla2g4a  | NM_008869.2    |
| Il1rn   | NM_031167.4    | Map3k5   | NM_008580.4    | Plcb1    | NM_019677.1    |
| Il2     | NM_008366.2    | Map3k7   | NM_172688.2    | Ppp1r12b | NM_001081307.1 |
| Il22    | NM_016971.1    | Map3k9   | NM_177395.4    | Prkca    | NM_011101.3    |
| Il22ra2 | NM_178258.5    | Mapk1    | NM_001038663.1 | Prkcb1   | NM_008855.2    |
| Il23a   | NM_031252.1    | Mapk14   | NM_011951.2    | Ptk2     | NM_007982.2    |
| Il23r   | NM_144548.1    | Mapk3    | NM_011952.2    | Rac1     | NM_009007.2    |
| Il3     | NM_010556.4    | Mapk8    | NM_016700.3    | Raf1     | NM_029780.3    |
| Il4     | NM_021283.1    | Mapkapk2 | NM_008551.1    | Rapgef2  | NM_001099624.2 |
| Il5     | NM_010558.1    | Mapkapk5 | XM_990515.1    | Rhoa     | NM_016802.4    |
| Il6     | NM_031168.1    | Masp1    | NM_008555.2    | Ripk1    | NM_009068.3    |
| Il6ra   | NM_010559.2    | Masp2    | NM_010767.3    | Ripk2    | NM_138952.3    |
| Il7     | NM_008371.2    | Max      | NM_008558.1    | Rock2    | NM_009072.2    |
| Il8ra   | NM_178241.4    | Mbl2     | NM_010776.1    | Rps6ka5  | NM_153587.2    |
| Il8rb   | NM_009909.3    | Mef2a    | XM_976032.1    | Shc1     | NM_011368.4    |
| Il9     | NM_008373.1    | Mef2b    | NM_001045484.1 | Stat1    | NM_009283.3    |
| Itgb2   | NM_008404.4    | Mef2c    | NM_025282.2    | Tgfb1    | NM_011577.1    |
| Jun     | NM_010591.2    | Mef2d    | NM_133665.3    | Tgfb2    | NM_009367.1    |
| Keap1   | NM_016679.4    | Mknk1    | NM_021461.4    | Tgfb3    | NM_009368.2    |
| Kng1    | NM_023125.3    | Myc      | NM_010849.4    | Tgfbr1   | NM_009370.2    |
| Limk1   | NM_010717.2    | Myd88    | NM_010851.2    | Tlr1     | NM_030682.1    |
| Lta     | NM_010735.1    | Myl2     | NM_010861.3    | Tlr2     | NM_011905.2    |
| Ltb     | NM_008518.2    | Nfatc3   | NM_010901.2    | Tlr3     | NM_126166.2    |
| Ly96    | NM_016923.1    | Nfe2l2   | NM_010902.3    | Tlr4     | NM_021297.2    |
| Maff    | NM_010755.3    | Nfkb1    | NM_008689.2    | Tlr5     | NM_016928.2    |
| Mafg    | XM_001002362.1 | Nos2     | NM_010927.3    | Tlr6     | NM_011604.3    |
| Mafk    | NM_010757.2    | Nox1     | NM_172203.1    | Tlr7     | NM_133211.3    |

|         |                |  |  |  |  |
|---------|----------------|--|--|--|--|
| Tnf     | NM_013693.1    |  |  |  |  |
| Tnfsf14 | NM_019418.2    |  |  |  |  |
| Tollip  | NM_023764.3    |  |  |  |  |
| Tradd   | NM_001033161.2 |  |  |  |  |
| Traf2   | NM_009422.2    |  |  |  |  |
